# Supplementary material for: Endogenous Levels of Alpha-Synuclein Modulate Seeding and Aggregation in Cultured Cells
Source: Springer Nature journal article supplement (doi:10.1007/s12035-021-02713-2), 2022-01-04

# Supplementary Figure 1

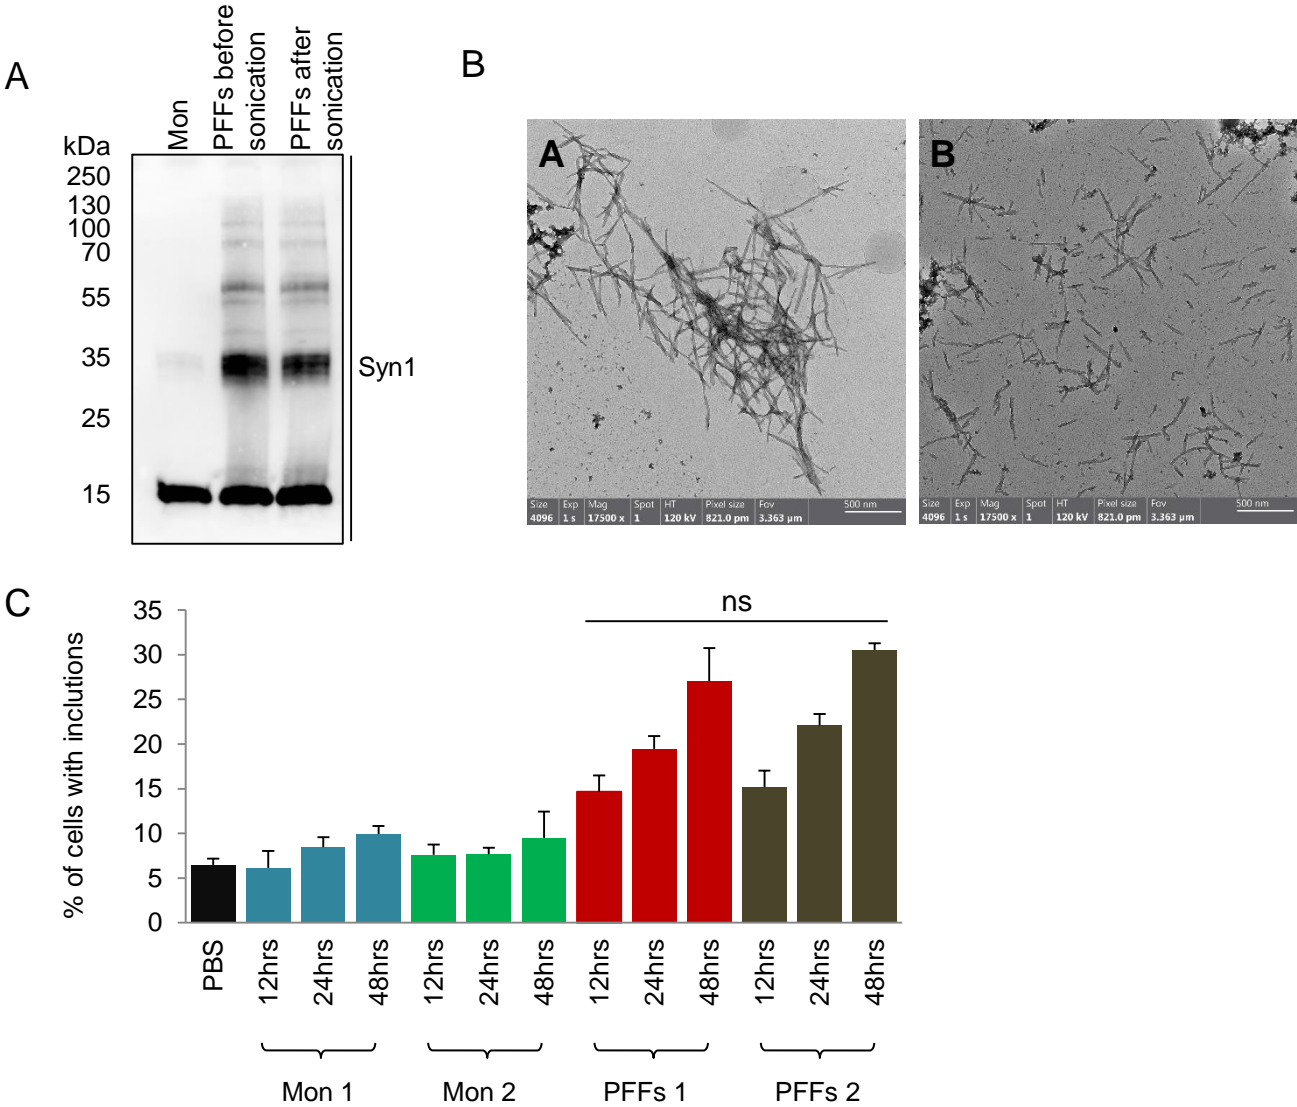

# Supplementary Figure 2

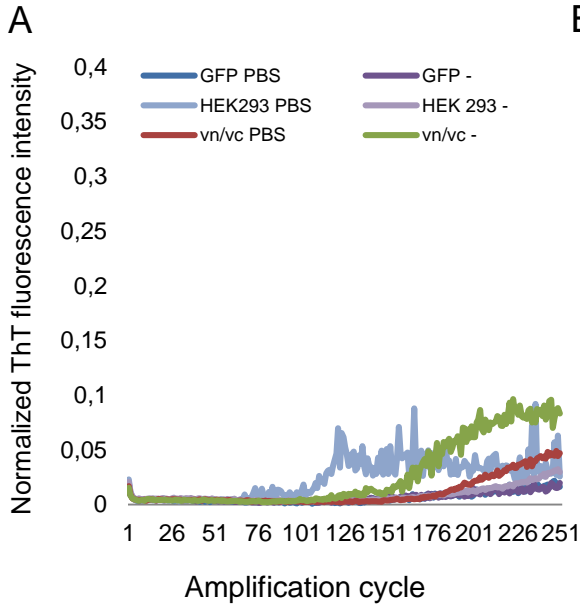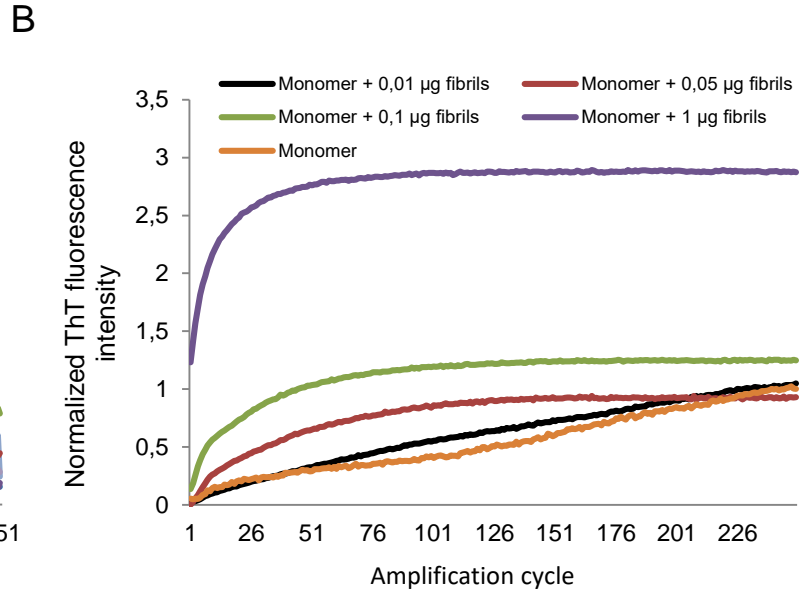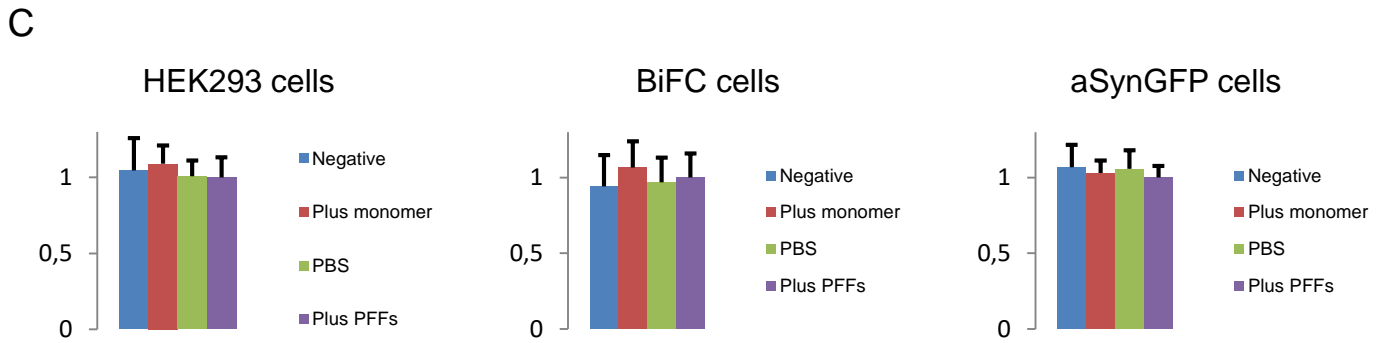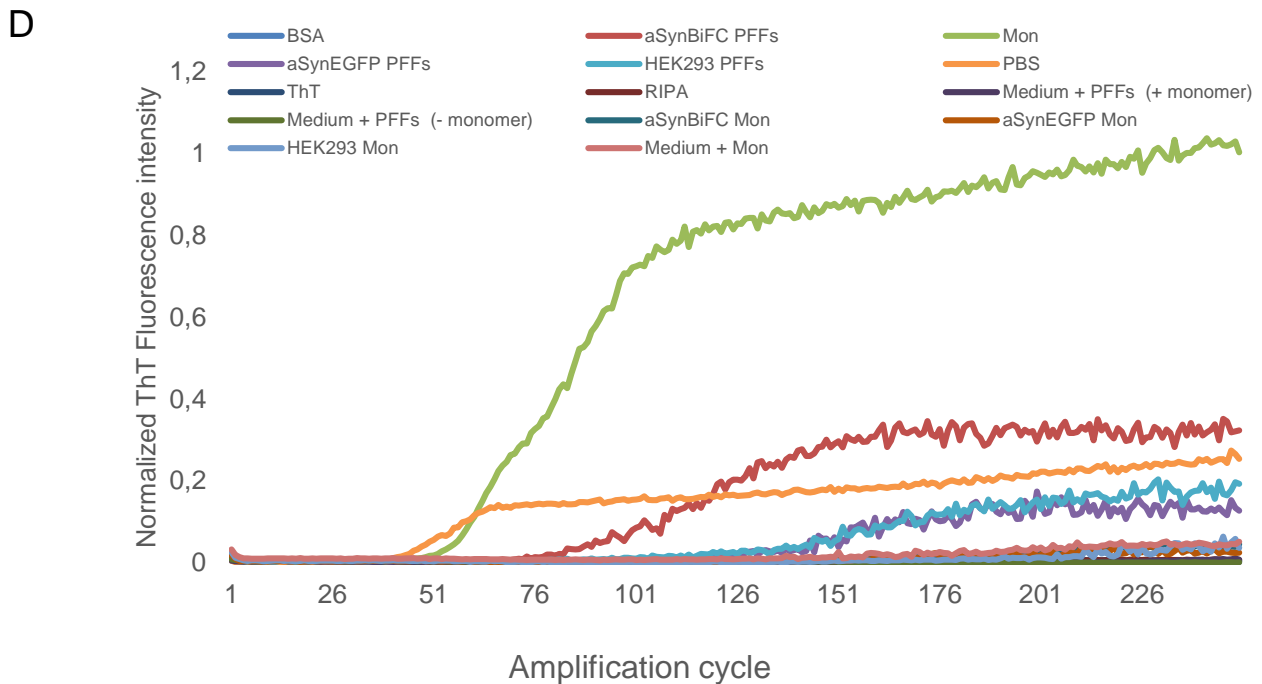

# Supplementary Figure 3

A

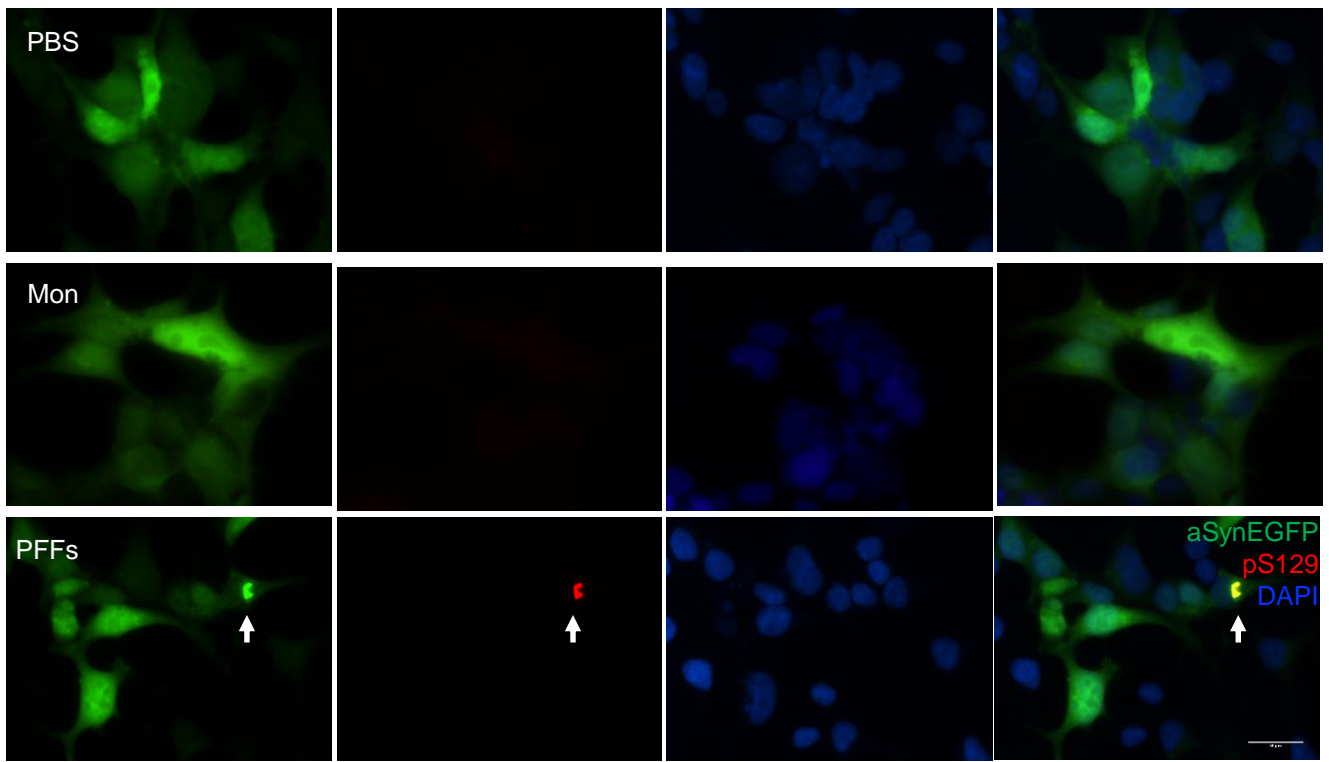

B

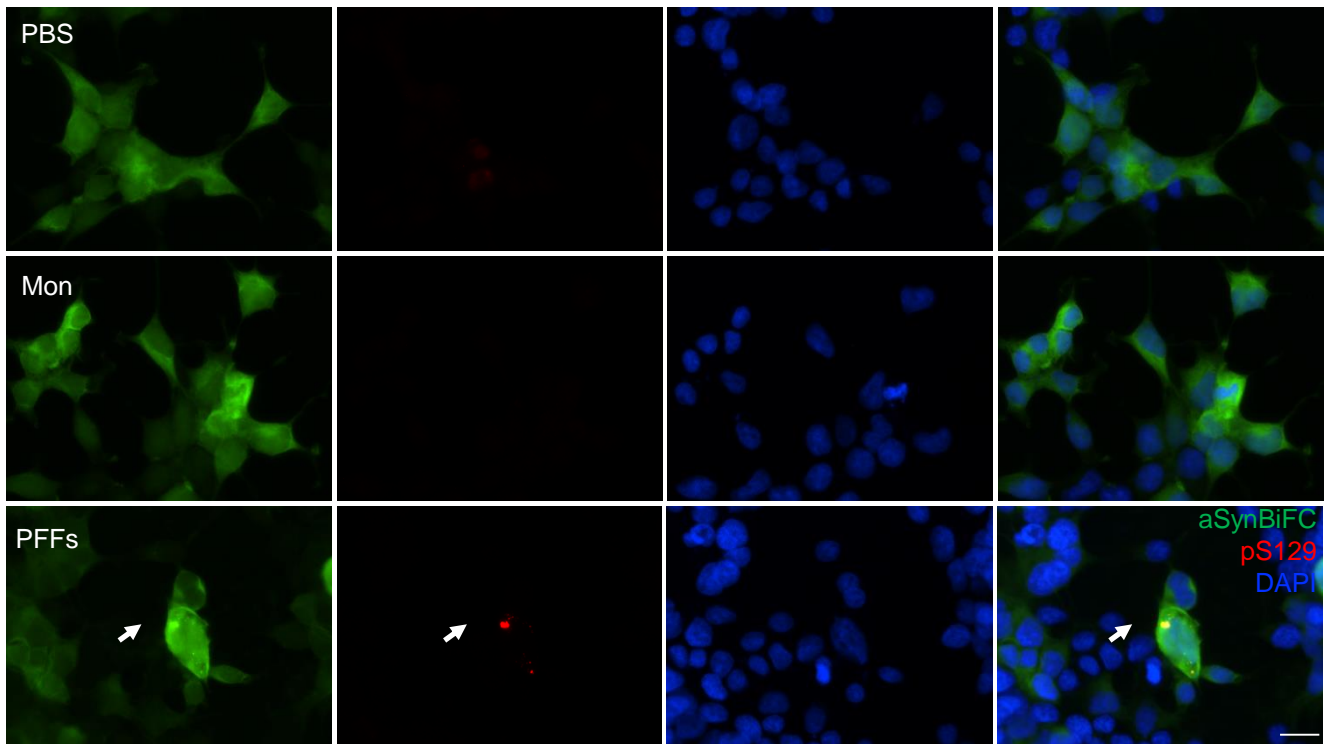

# Supplementary Figure 4

A

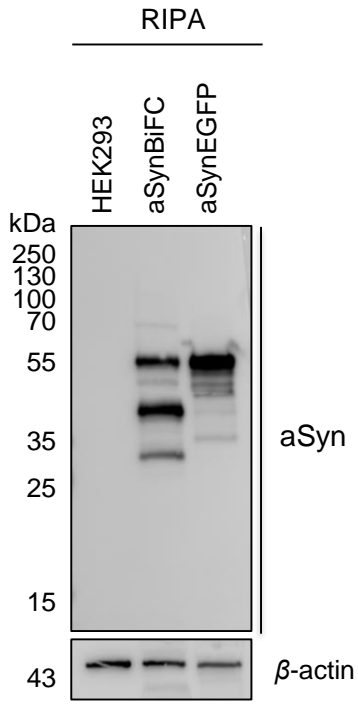

B

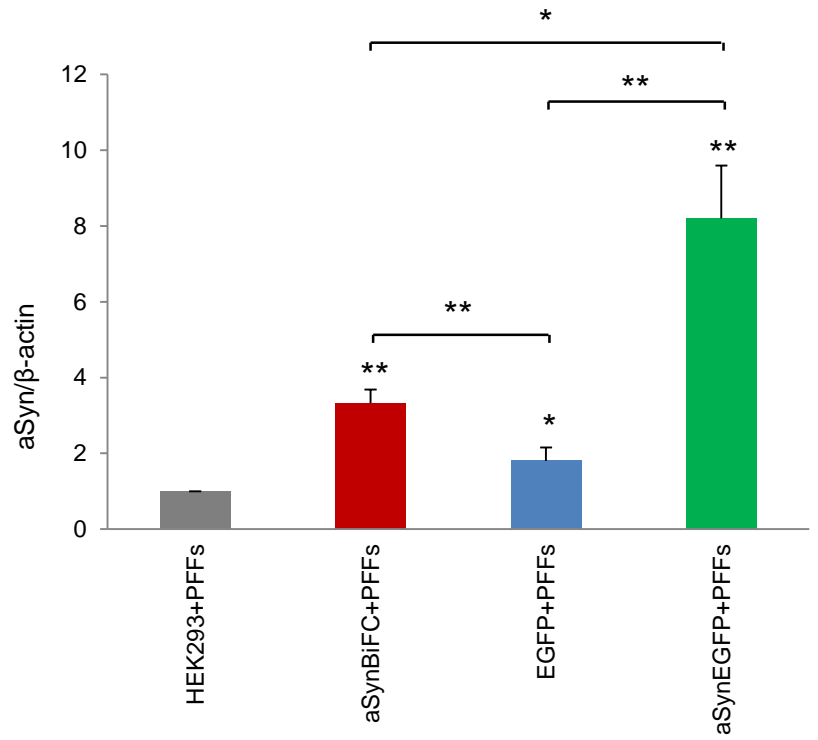

# Supplementary Figure 5

A

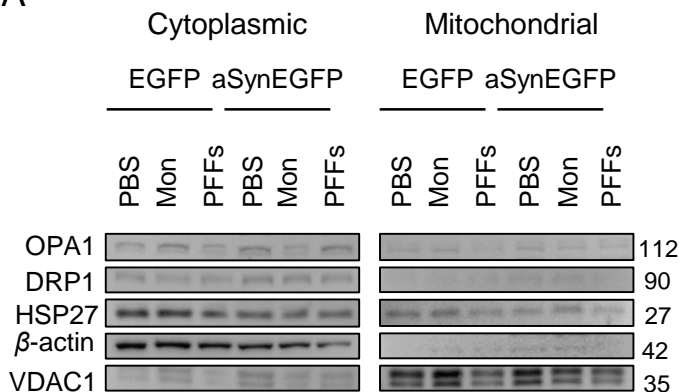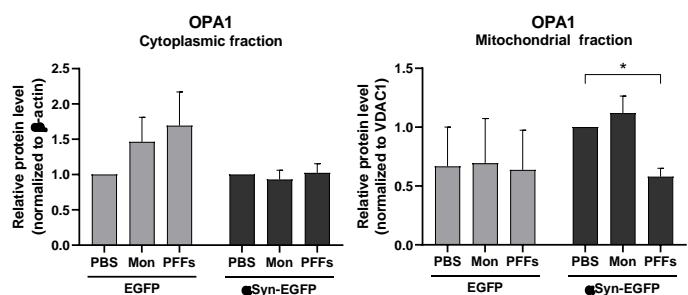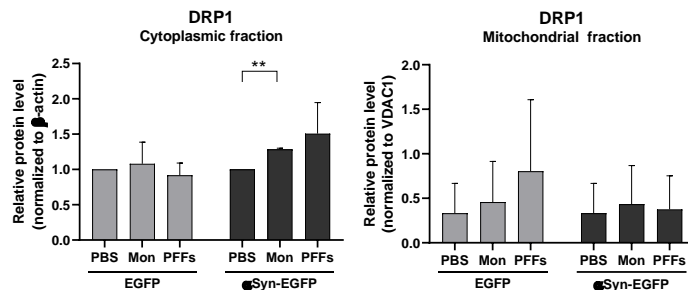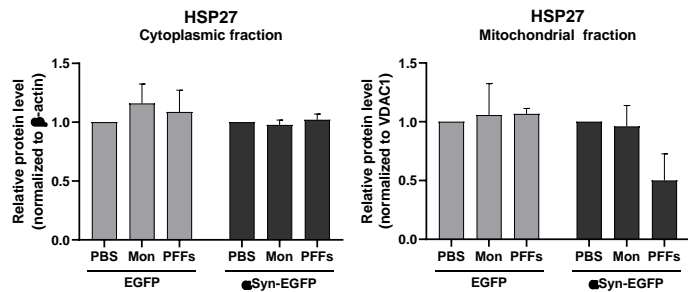

B

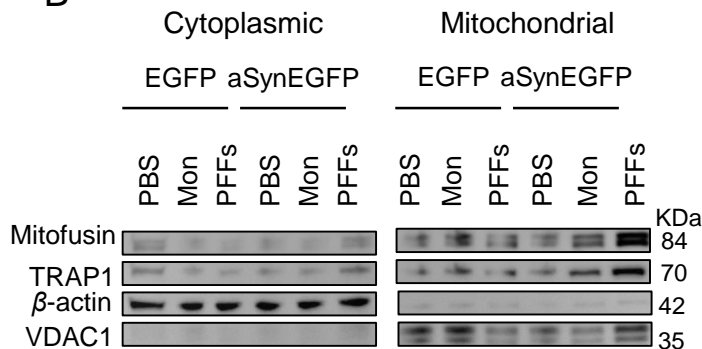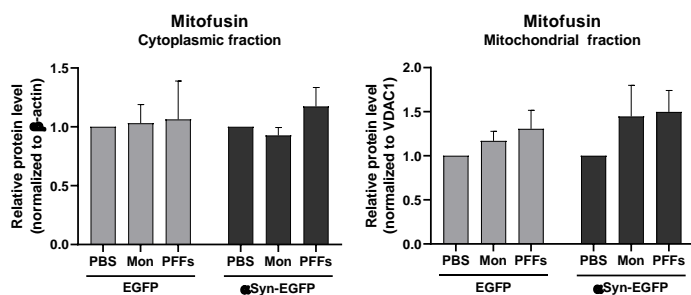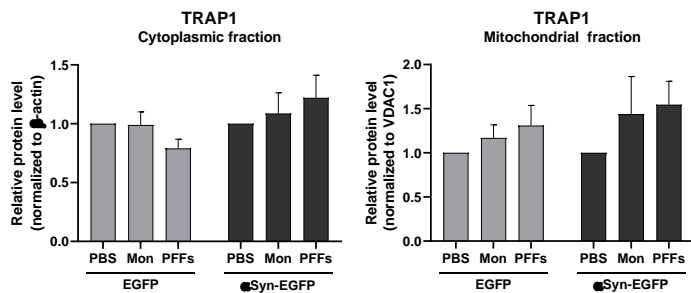

# Supplementary Figure 6

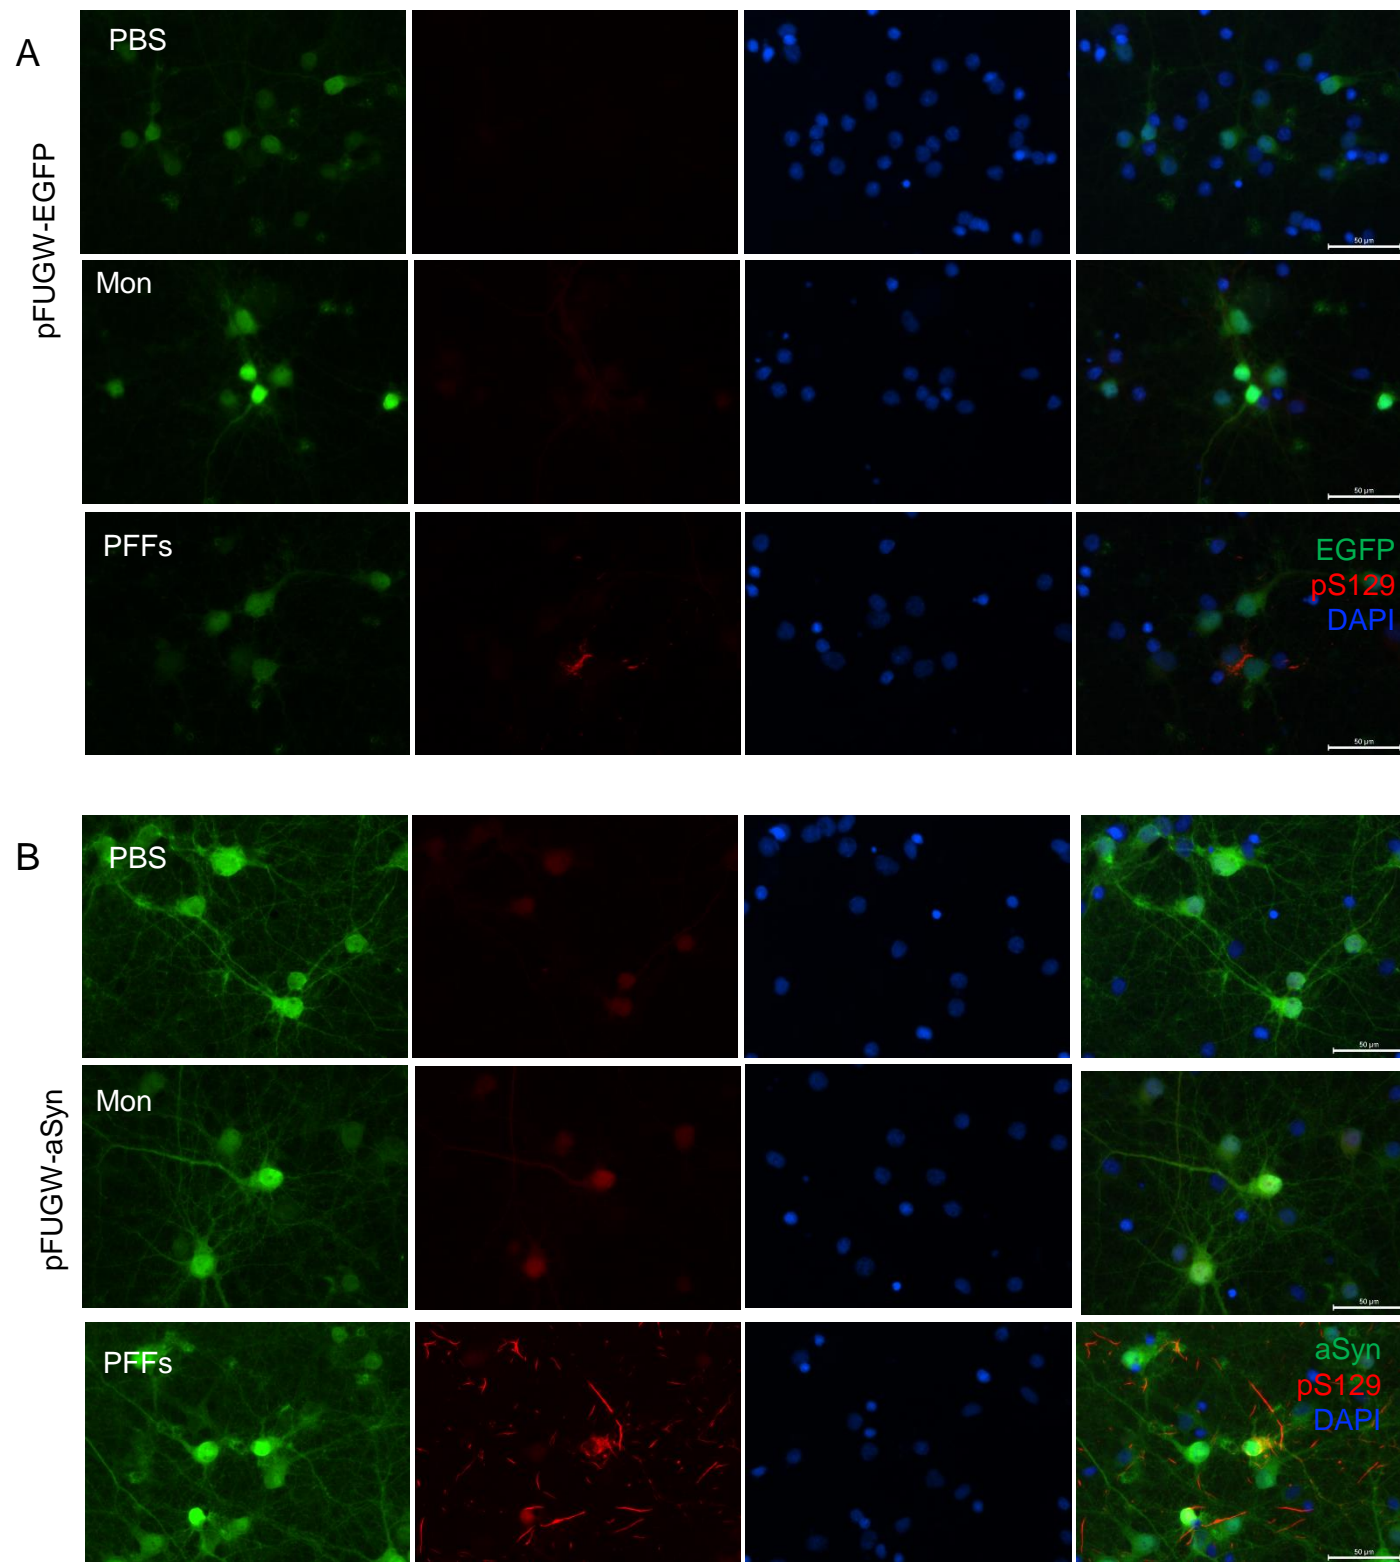



# Supplementary Figure 7

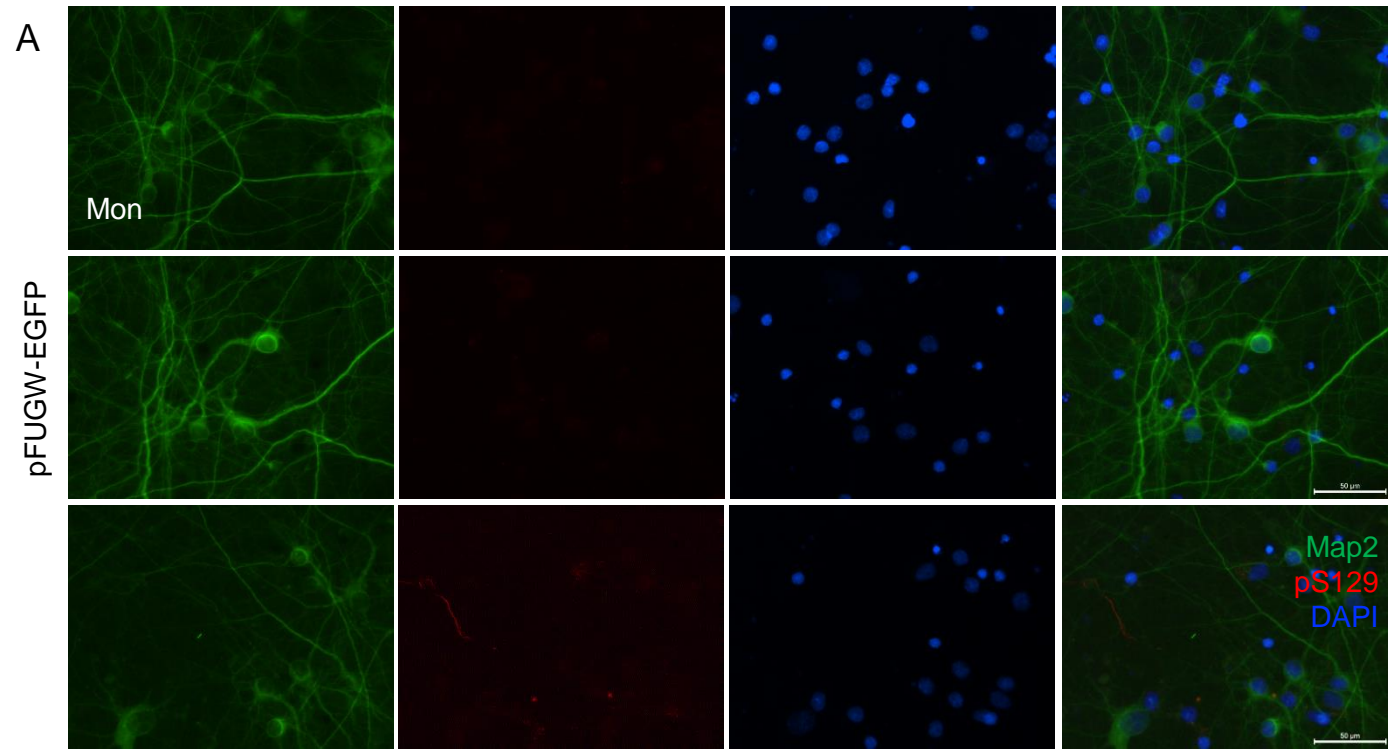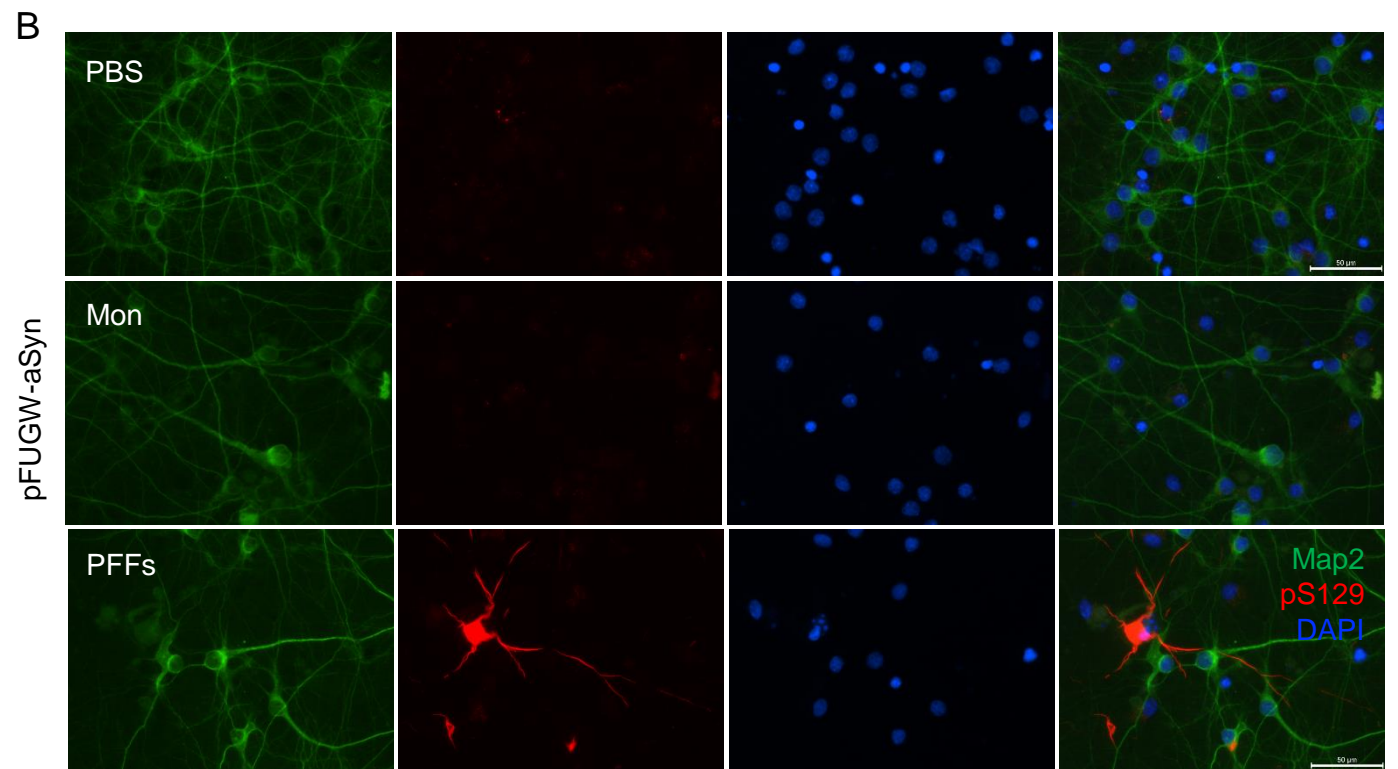

Supplement: MOESM1 [file 12035_2021_2713_MOESM1_ESM.pdf]
